# Supplementary material
Source: PubMed Central journal article supplement (PMC2890040)
Supplement: NIHMS184771-supplement-Supplementary_table.pdf [file NIHMS184771-supplement-Supplementary_table.pdf]

**Table S1.** Average C $\alpha$ -RMSDs and standard deviations (in parenthesis) calculated for whole protein(s) are shown for different simulation systems. The difference from Table 2 is that here not domains but whole protein(s) (*e.g.*, FVIIa, sTF, and sTF:FVIIa) are superimposed and C $\alpha$ -RMSDs are calculated for the superimposed, whole protein(s), respectively.

The C $\alpha$ -RMSDs of FVIIa (12.34 Å in solution, 7.11 Å on the membrane, and 2.94 Å on the membrane as the complex) also show clearly that sTF “lock”s FVIIa (*cf. Locking effect of sTF on the rocking motion of FVIIa in Results and Discussion*).

| System                 | Environment | C $\alpha$ -RMSD (Å)<br>Mean (SD) |
|------------------------|-------------|-----------------------------------|
| FVIIa                  | Solution    | 12.34 (3.91)                      |
| sTF                    | Solution    | 3.03 (0.45)                       |
| FVIIa                  | Membrane    | 7.11 (2.01)                       |
| sTF                    | Membrane    | 2.37 (0.43)                       |
| sTF:FVIIa of sTF:FVIIa | Membrane    | 2.94 (0.41)                       |
| FIIA of sTF:FVIIa      | Membrane    | 2.88 (0.43)                       |
| sTF of sTF:FVIIa       | Membrane    | 2.61 (0.45)                       |
